# 1 DNA methylation-based forensic age estimation in human bone

2

3 Shyamalika Gopalan<sup>1</sup>, Jonathan Gage<sup>1</sup>, Brenna M. Henn<sup>1,2,3</sup>

4

5 <sup>1</sup>Department of Ecology and Evolution, Stony Brook University, Stony Brook, NY 11794, USA.

6 <sup>2</sup>Department of Anthropology, University of California, Davis, CA 95616, USA.

7 <sup>3</sup>UC Davis Genome Center, University of California, Davis, CA 95616, USA.

8

## 9 **Abstract**

10

11 DNA methylation is an epigenetic modification of cytosine nucleotides that represents a  
12 promising suite of aging markers with broad potential applications. In particular, determining  
13 an individual's age from their skeletal remains is an enduring problem in the field of forensic  
14 anthropology, and one that epigenetic markers are particularly well-suited to address.

15 However, all DNA methylation-based age prediction methods published so far focus on tissues  
16 other than bone. While high accuracy has been achieved for saliva, blood and sperm, which are  
17 easily accessible in living individuals, the highly tissue-specific nature of DNA methylation  
18 patterns means that age prediction models trained on these particular tissues may not be  
19 directly applicable to other tissues. Bone is a prime target for the development of DNA  
20 methylation-based forensic identification tools as skeletal remains are often recoverable for  
21 years post-mortem, and well after soft tissues have decomposed. In this study, we generate  
22 genome-wide DNA methylation data from 32 individual bone samples. We analyze this new  
23 dataset alongside published data from 133 additional bone donors, both living and deceased.  
24 We perform an epigenome-wide association study on this combined dataset to identify 108  
25 sites of DNA methylation that show a significant relationship with age (FDR < 0.05). We also  
26 develop an age-prediction model using lasso regression that produces highly accurate estimates  
27 of age from bone spanning an age range of 49-112 years. Our study demonstrates that DNA  
28 methylation levels at specific CpG sites can serve as powerful markers of aging, and can yield  
29 more accurate predictions of chronological age in human adults than morphometric markers.

## 30 Introduction

31  
32 Determining a person's age from skeletal and dental remains has been an integral component  
33 of building a biological profile for several decades of forensic investigations. Classic methods  
34 rely on morphological features of development and functional decline, such a tooth eruption,  
35 suture closure, and bone density (Cunha et al., 2009; Franklin, 2010). However, these  
36 approaches suffer from difficulties in implementation and standardization (Cunha et al., 2009;  
37 Franklin, 2010). One such issue is that there are few morphological features that can be used to  
38 precisely estimate the age of adults, as most developmental processes that can distinguish  
39 between juveniles of different ages cease by adulthood. Thus, different skeletal features are  
40 analyzed for this purpose in different age classes, but the overall accuracy of morphology-based  
41 estimates is typically low for adults (Cunha et al., 2009; Franklin, 2010).

42 Molecular-based methods of age estimation represent a promising alternative to those  
43 based on morphometrics. One early approach was based on the degree of amino-acid  
44 racemization of bones and teeth, which produces highly accurate estimates of age (Meissner  
45 and Ritz-Timme, 2010; Ohtani and Yamamoto, 2010). However, this method still suffers from  
46 practical limitations, such as difficulties in standardizing the procedure, and the need for  
47 specialized equipment and technical expertise to isolate the tissue of interest and conduct  
48 protein fractionation (Meissner and Ritz-Timme, 2010; Ohtani and Yamamoto, 2010).

49 More recently, advances in the study of DNA methylation have driven its popularity in  
50 the field of forensic sciences as a general molecular approach to estimating individual age that  
51 can be applied in various contexts. DNA methylation is a chemical modification to the primary  
52 DNA sequence; in mammals, it occurs predominantly on cytosine nucleotides that are in a  
53 cytosine-guanine dinucleotide context (a CpG site). It has been shown that, at certain CpG sites,  
54 the average level of DNA methylation changes measurably throughout life in a manner that  
55 makes them potentially useful markers of human aging. This has led to a profusion of methods  
56 being developed for tissues such as sperm, blood, saliva, and teeth which produce highly  
57 accurate estimates based on DNA methylation levels from relatively few CpG sites, measured  
58 using widely used, often commercially available, assay methods (Hong et al., 2017; Lee et al.,

59 2015; Vidaki et al., 2017; Yi et al., 2014; Zbieć-Piekarska et al., 2015b). However, there does not  
60 yet exist a DNA methylation-based method for estimating age from human bone, a tissue type  
61 that is highly relevant to the field of forensic sciences. Methods developed for other tissues  
62 likely cannot be applied directly to bone due to the highly tissue-specific nature of age-related  
63 DNA methylation patterns (Dmitrijeva et al., 2018; Hannum et al., 2013; Lee et al., 2015;  
64 Maegawa et al., 2010; Slieker et al., 2018).

65 In this study, we analyze bone-derived DNA methylation data from hundreds of  
66 thousands of CpG sites across the genome in a large sample of human adults to identify CpG  
67 sites that change significantly with age. We then use a subset of these sites to develop a highly  
68 accurate prediction model for individuals in an age class where morphological methods can be  
69 problematic. Furthermore, we show that our model exhibits higher accuracy and relies on  
70 fewer CpG sites compared to a previously published model that was developed for use on  
71 multiple tissues.

72

## 73 **Methods**

### 74 *Description of datasets*

75 Three previously analyzed and published datasets were derived from bone biopsies of  
76 living donors, assayed on the Illumina Human Methylation 450k array, and previously analyzed  
77 (Table 1) (Horvath et al., 2015; Reppe et al., 2017). Additional data were generated for this  
78 study from bone-derived DNA from deceased donors from both forensic and preserved  
79 specimens and assayed on the Illumina Human Methylation EPIC array (Table 1).

80

81 Table 1 - Description of datasets analyzed.

82

| <b>Dataset (GEO accession)</b>                      | <b>N samples</b>      | <b>N females</b> | <b>Age range</b> | <b>Sample type</b> | <b>Methylation array</b> | <b>Citation</b>        |
|-----------------------------------------------------|-----------------------|------------------|------------------|--------------------|--------------------------|------------------------|
| Osteoporosis study                                  | 84                    | 84               | 49-86            | Living donor       | 450k                     | (Reppe et al., 2017)   |
| Multi-tissue study (GSE64490)                       | 48                    | 46               | 49-104           | Living donor       | 450k                     | (Horvath et al., 2015) |
| Supercentenarian from multi-tissue study (GSE64491) | 1 (plus 3 replicates) | 1                | 112              | Deceased donor     | 450k                     | (Horvath et al., 2015) |
| Preserved specimens                                 | 19                    | 7                | 60-97            | Deceased donor     | EPIC                     | This study             |
| Forensic specimens                                  | 13                    | 4                | 18-95            | Deceased donor     | EPIC                     | This study             |

83

84 *Forensic specimens*

85 Forensic specimens were collected from the Forensic Anthropology Center at Texas  
86 State (FACTS) in San Marcos, Texas. Donated specimens are typically allowed to decompose  
87 naturally in an outdoor environment on the premises for 2-3 years, after which the bones are  
88 cleaned with a mild detergent and housed in their storage facilities. For this study, trabecular  
89 bone from femurs was collected based on a previously published protocol for minimally  
90 destructive sampling for skeletal remains (Gibbon et al., 2009). Briefly, the outside of the bone  
91 was cleaned between the medial and lateral condyles with 95% ethanol. The femur was then  
92 held vertically while a small hole was drilled with a Dremel 200 rotary tool and a 1/8" diameter  
93 bit. After rotating the fully inserted drill bit and withdrawing it, the femur was inverted over a  
94 collection tube to collect the bone powder. Between 0.1 and 1g (0.67g average) of bone  
95 powder was recovered for these samples.

96

97 *Preserved specimens*

98 Preserved specimens were collected from the Department of Anatomical Sciences Stony  
99 Brook University. Bodies donated to this facility are treated with chemical preservatives and  
100 used in medical and dental anatomy courses. For each sample, a Dremel 200 rotary tool with a  
101 1" cutting disc was used to extract a piece of tissue that contained the petrous portion of the  
102 temporal bone, which has been previously shown to be among the densest skeletal elements in  
103 the body and typically contains relatively uncontaminated endogenous DNA in even ancient  
104 samples (Pinhasi et al., 2015). This piece was then pre-digested in a solution of TE buffer and  
105 proteinase K at 55°C for up to 5 days, or until all soft tissue was dissolved, leaving behind only  
106 bone. This piece was then subsampled into smaller pieces and ground to a fine powder using a  
107 combination of a mortar and pestle and an IKA tube mill. Between 0.27 and 1.13g (0.54g  
108 average) of bone powder per sample was extracted.

109

110 *DNA extraction*

111 Bone samples underwent a pre-digestion step prior to DNA extraction using a standard  
112 phenol-chloroform method. The powder was incubated in a solution of 250  $\mu$ L of N-

113 Laurylsarcosine and 30uL proteinase K in 10mL EDTA at 55°C on a nutating mixer for two days  
114 to dissolve the mineral structure of the bone. If powder was not completely dissolved after two  
115 days, an additional 5mL of EDTA was added and the sample incubated for a further two days.  
116 One volume of phenol-chloroform was then added to the dissolved bone solution, shaken at  
117 room temperature for one minute, and centrifuged for 20 minutes at 3,500 rpm. The aqueous  
118 phase was transferred to a fresh tube where one volume (the same amount as EDTA and  
119 phenol-chloroform) of chloroform was added. The sample was again shaken for one minute and  
120 centrifuged for 20 minutes. The aqueous phase was then transferred to an Amicon Ultra-15  
121 filter and centrifuged for up to 20 minutes, or until most of the liquid passed through. The filter  
122 was washed with 12mL of ultra-pure HPLC water and spun down until most of the liquid passed  
123 through. If necessary, this step was repeated until the wash-through liquid was clear.

124

#### 125 *Methylation array data processing and quality control*

126 DNA methylation data generated for this study was preprocessed from raw intensity  
127 files (IDATs) using the R package minfi (Aryee et al., 2014). The GEO deposited datasets were  
128 preprocessed from raw methylated and unmethylated counts using the R packages lumi and  
129 methylumi (Davis et al., 2015; Du et al., 2008). Raw data was not available for the osteoporosis  
130 study, so pre-processed and rescaled data (by beta mixture quantile dilation – BMIQ) provided  
131 by the author was used (Reppe et al., 2017). All raw data were first filtered for poorly  
132 performing samples and CpG sites. Samples were flagged if their median methylated or  
133 unmethylated levels were low (if log<sub>2</sub> of the count was less than 10.5), if more than 10% of  
134 measured probes exceeded a detection p-value threshold of 1%, or if the sex predicted by X  
135 and Y chromosome methylation levels did not match the reported sex, as per standard DNA  
136 methylation array processing procedures (Aryee et al., 2014). All forensic samples failed these  
137 quality control measures. Probes that were among previously identified cross-reactive probes  
138 were removed (Chen et al., 2013; Pidsley et al., 2016). Colour correction, background  
139 correction, and functional normalization of IDAT data was conducted with the  
140 ‘preprocessFunnorm’ function in minfi (Aryee et al., 2014). Colour correction, background  
141 correction, and shift and scaling normalization of signal count data was conducted with the

142 'lumiMethyC' and 'lumiMethyN' functions in lumi (Du et al., 2008). Rescaling of type 1 and 2  
143 probes was conducted by BMIQ, implemented in the R package waterMelon. All remaining  
144 probes that failed a detection p-value threshold of 5% were then set to NA and all CpG sites on  
145 sex chromosomes were also removed. Continuous beta values for each CpG site, which range  
146 from 0 (indicating that the site is completely unmethylated) to 1 (completely methylated), were  
147 extracted for subsequent analysis.

148

#### 149 *Principal components analyses*

150 We conducted a principal components analyses (PCA) on the merged dataset of samples  
151 that were successfully assayed (n = 155) in order to identify factors correlated with significant  
152 sources of variation across the datasets. PCAs were conducted with the 'prcomp' function in R.

153

#### 154 *Epigenome-wide association study (EWAS)*

155 An EWAS for age was performed using the R package CpGassoc on the combined  
156 dataset of 155 individuals and all CpG sites that were present on the 450k dataset and passed  
157 quality control. Dataset identity was included as a covariate to control for excessive genomic  
158 inflation in the EWAS.

159

#### 160 *Horvath age prediction*

161 The original Horvath age prediction algorithm was implemented by using the 'agep'  
162 function from the R package waterMelon on the preprocessed and normalized data (Horvath,  
163 2013; Pidsley et al., 2013). The optional normalization step in the Horvath workflow was not  
164 used.

165

#### 166 *Developing age prediction models*

167 We created a training set of data to develop an age prediction model by randomly  
168 sampling approximately 70% of individuals from each dataset, except for GSE64491, which  
169 contains four replicates of one individual; these were evenly divided into the test and training  
170 dataset. We then made minor label adjustments to ensure that the training set always

171 contained the widest possible age range. We then used lasso regression, implemented in the R  
172 package glmnet (Friedman et al., 2010), to select predictors from only those CpG sites that  
173 were found to be significantly associated with age (FDR < 0.05) in the EWAS. We varied the  
174 regularization penalty parameter ( $\lambda$  – not to be confused with the genomic inflation factor)  
175 across a range to select two primary models: the best model had the lowest prediction error in  
176 the training dataset, and the other model had a prediction error within one standard error of  
177 the minimum in the training dataset.

178

### 179 *Gene region enrichment analysis*

180 The 37 CpG sites comprising the best performing model were tested for enrichment of  
181 several possible categories, including gene and disease ontology terms, phenotypes, genes, and  
182 Molecular Signatures Database (MSigDB) terms using Genomic Regions Enrichment of  
183 Annotation Tool (GREAT) (McLean et al., 2010). A custom background set of all CpGs tested in  
184 the EWAS was used.

185

## 186 **Results**

187

### 188 *Data quality*

189 Genome-wide methylation data was successfully generated for all preserved specimens,  
190 but all forensic samples failed post-assay quality control measures. For the latter, both median  
191 methylated and unmethylated signals were too low to pass the threshold and all samples had a  
192 high proportion of unreliable probes (see *Methods*). Furthermore, while the median methylated  
193 signal was significantly lower than the median unmethylated signal across all samples ( $p = 9.2 \times$   
194  $10^{-6}$ , paired sample t-test), this difference was more pronounced in the forensic samples ( $p =$   
195  $4.1 \times 10^{-14}$ , t-test) (Figure 1). The forensic samples were excluded from all subsequent analyses.

196

### 197 *Principal components analysis*



198           A principal components analysis of the 155 successfully assayed samples showed that  
199 batch effects were the major drivers of the first two principal components, which together  
200 accounted for over 55% of the variation in the dataset (Figure 2).

201

#### 202 *Epigenome-wide association study (EWAS)*

203           We performed an EWAS on the merged DNA methylation dataset to identify CpG sites  
204 that were significantly associated with age in bone tissue (see *Methods*). When not correcting  
205 for dataset identity, we observed extreme genomic inflation, which is not unexpected given the  
206 substantial batch effects observed and the differences in age distributions across the three  
207 largest datasets (Figures 2-3; Table 1). When using dataset identity as a covariate in the EWAS,  
208 this inflation was greatly reduced, and 108 CpG sites were significantly associated with age (FDR  
209 < 0.05) (Figures 3-4).

210

#### 211 *Developing and evaluating models for chronological age prediction for bone*

212           We used the prediction model published by Horvath (2013), which leverages DNA  
213 methylation information from 353 CpG sites, to estimate the age of the individuals in the  
214 merged dataset. The model was trained on DNA methylation data derived from 13 different  
215 tissue types, including bone marrow, but not hard bone tissue (i.e. osteocytes and osteoblasts)  
216 (Horvath 2013). It was previously tested on the bone samples from the GSE64490 and  
217 GSE64491 datasets in Horvath et al. 2015 (see Figure 6 in that paper) and was consequently  
218 described as also being applicable to hard bone tissues, although no metric of accuracy was  
219 reported (Horvath et al 2015). We visually parsed 51 of the 52 data points in the GSE64490 and  
220 GSE64491 datasets using a plot digitizer (Rohatgi, 2018), and estimated the root mean squared  
221 error (RMSE) to be 8.1 years. Our application of the same model to these datasets, appears to  
222 have yielded more accurate results than the initial publication (5.9 and 6.3 years, respectively,  
223 and 6.0 across both datasets; Figure 5). The reasons for this are unclear, but could be attributed  
224 to differences in how the data were processed prior to running the age prediction algorithm  
225 (see *Methods* and *Discussion*).

226           We sought to determine if accurate estimates of individual age could be achieved for  
227 human bone using fewer than 353 sites. We split the individuals in the datasets into training  
228 and test groups and used lasso regression to select predictor variables from among the 108  
229 age-associated CpGs identified in the EWAS (see *Methods*). The model that minimized the  
230 prediction error in the training data was based on information from 46 sites, while a second  
231 model exhibited comparably low error using information from only 37 CpG sites. Both models  
232 included two CpG sites that are also used in the Horvath model. These two new models were  
233 also used to generate estimates of age for all individuals in the dataset, and the RMSE between  
234 the true age and the prediction in the test dataset was calculated (Table 2). Both models were  
235 more accurate than the Horvath model, with the sparser model (based on 37 CpG sites) being  
236 slightly more accurate in the test samples overall (Figure 5; Table 2). This model is hereafter  
237 referred to as the ‘bone clock’, and additional details for the specific CpG sites that comprise it  
238 are given in Table 3.

239           An enrichment analysis identified two significant categories as being overrepresented in  
240 these 37 bone clock CpG regions; the gene *ELOVL2* was represented twice (a 948-fold  
241 enrichment relative to the background,  $p = 2.1 \times 10^{-6}$ ), and genes bearing the motif ‘AAGCACA’  
242 in their 3’ untranslated regions (UTRs) were represented 8 times (4.8-fold enrichment,  $p = 2.1 \times$   
243  $10^{-4}$ ).

244

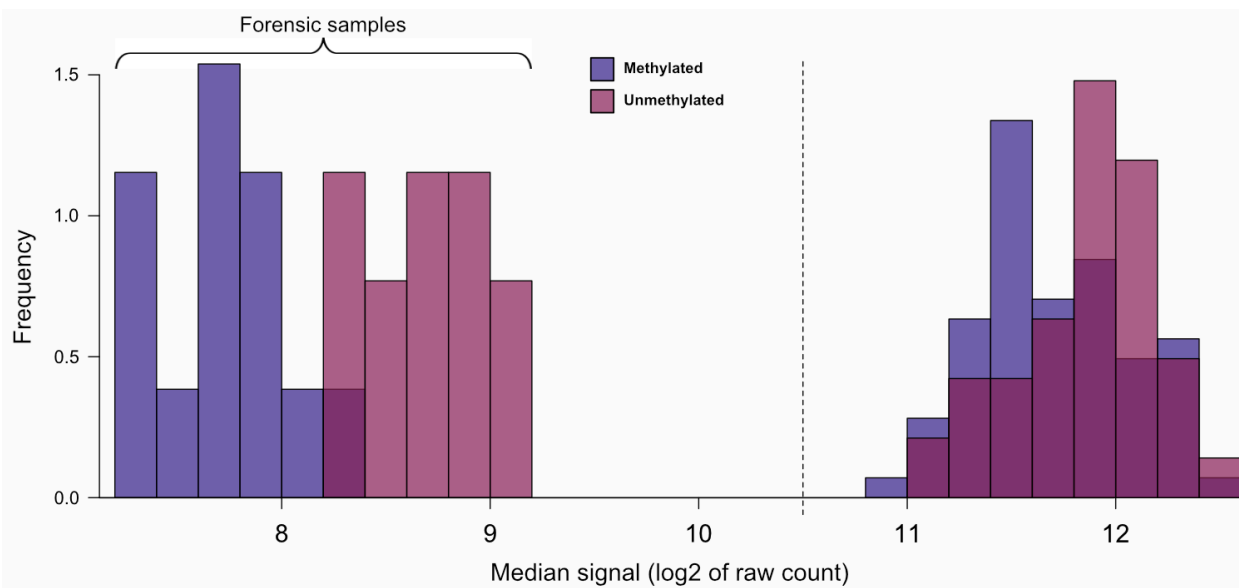

245

246

247 Figure 1 - The distribution of median methylated (blue) and unmethylated (red) signal values in  
248 forensic samples (left) and all other samples (right). The threshold typically used for post-assay  
249 quality control is indicated with the dashed line (Aryee et al., 2014). All forensic samples in this  
250 study failed to meet this threshold and were thus excluded from subsequent analysis.

251

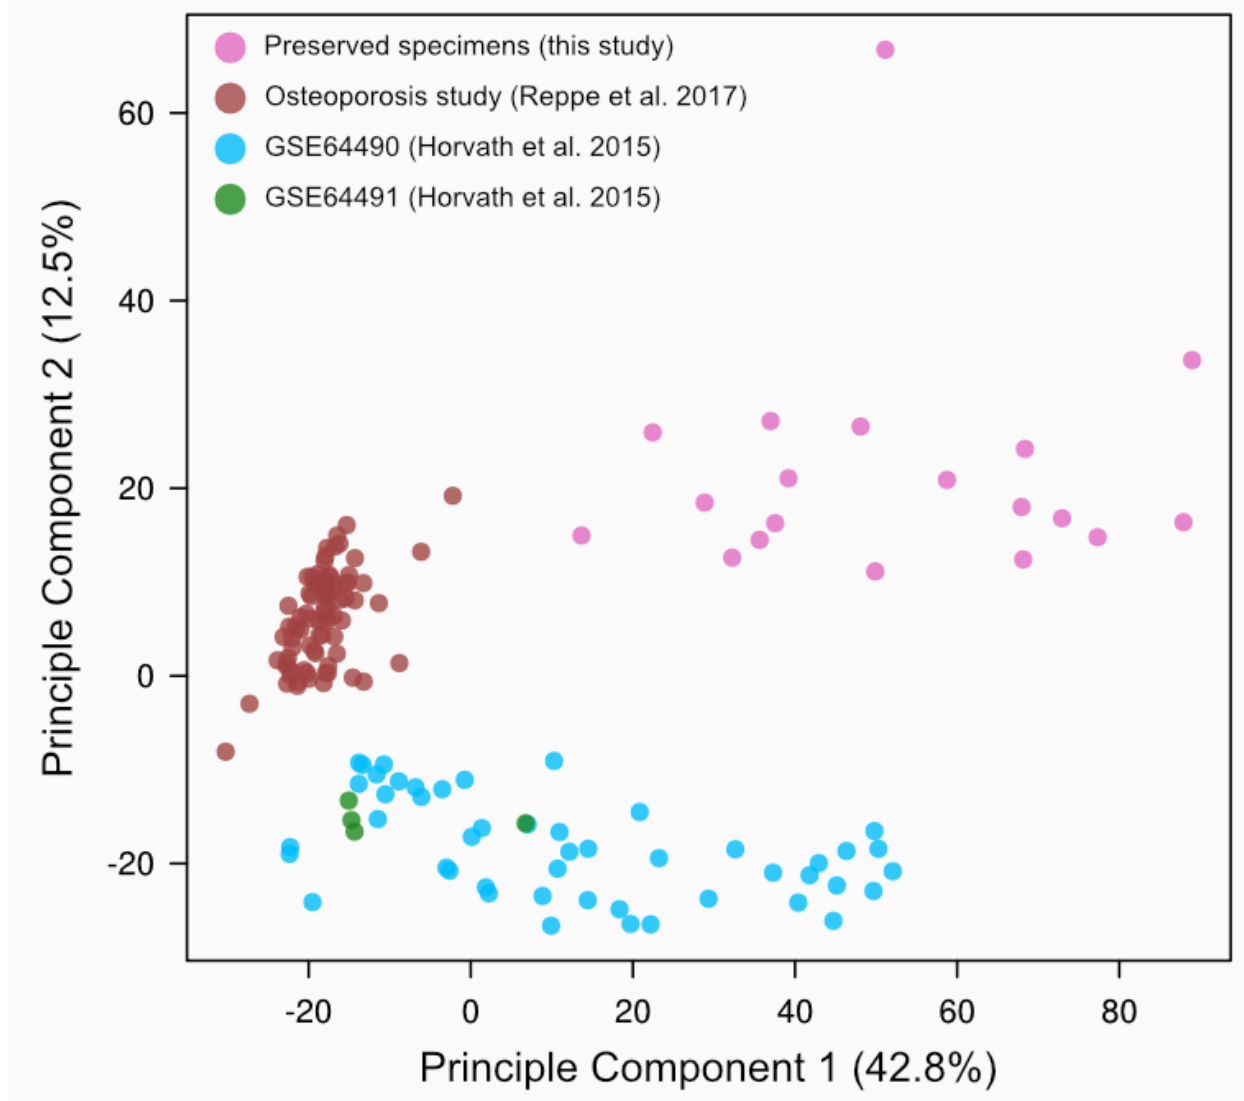

252

253

254 Figure 2 - Scatterplot of the first two principal components of variation in the DNA methylation

255 dataset.

256

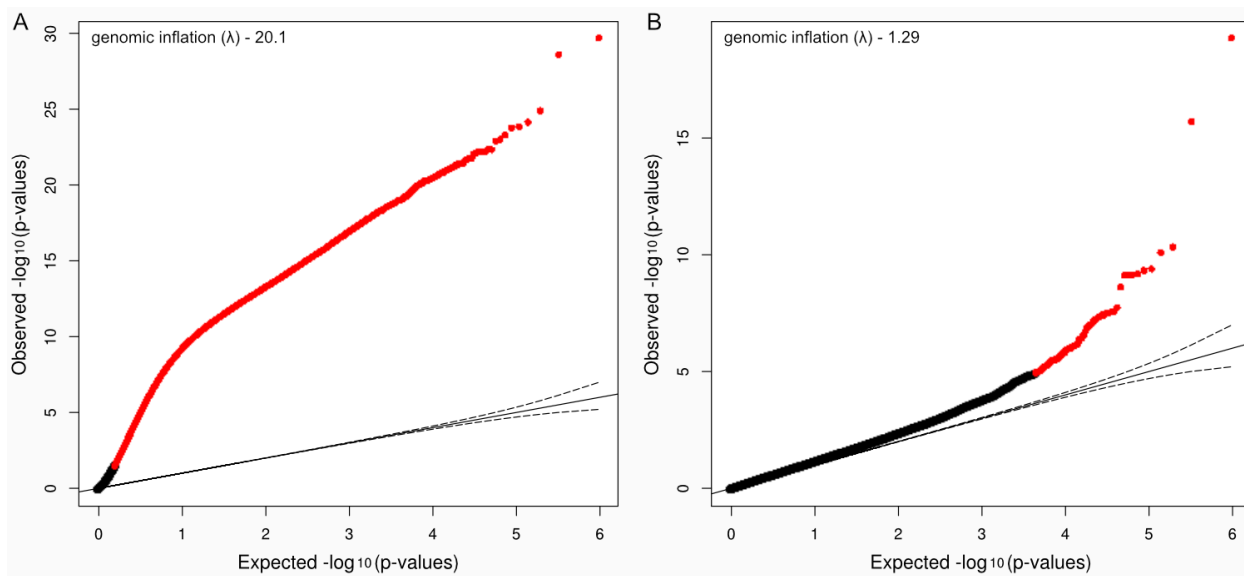

257

258

259 Figure 3 - Quantile-quantile plot of expected p-values (under a uniform distribution) versus  
260 observed p-values in the EWAS. The points represent p-values for a tested CpG site. Red points  
261 indicate those that are found to be significantly associated with age (FDR < 0.05). A) When no  
262 covariates are used, an excessive number of CpG sites are found to be significant. B) The  
263 inclusion of dataset identity appears to correct this, likely by accounting for batch effects  
264 between sets of samples that were assayed separately.

265

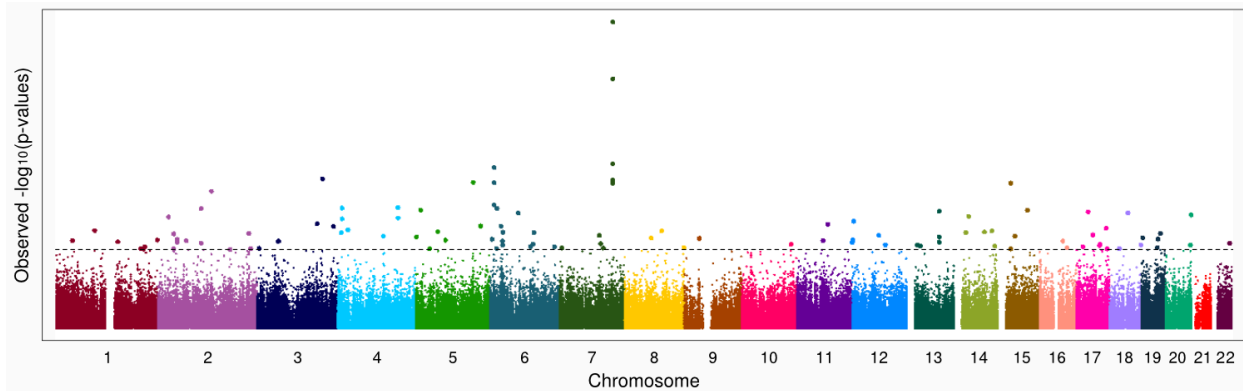

266

267

268 Figure 4 - Manhattan plot depicting the location of all CpG sites tested in the EWAS where

269 dataset identity was included as a covariate. The false discovery rate threshold of 0.05 is

270 indicated by the horizontal dashed line. 108 CpG sites were found to exceed this threshold

271 (larger dots).

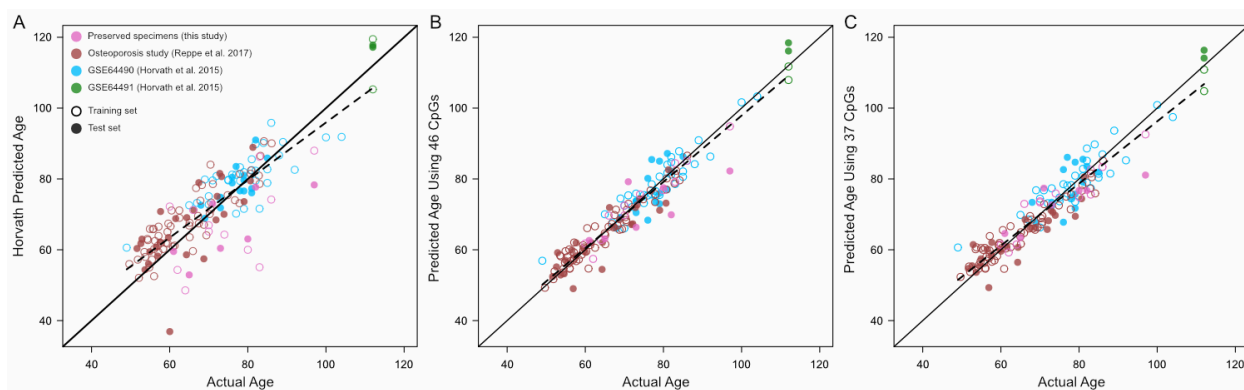

272

273

274 Figure 5 - True chronological age versus estimates from three DNA methylation-based models.

275 A) Age estimates from A) the Horvath model, based on DNA methylation data from 353 CpG

276 sites, B) the 46-site model and C) the 37-site model. Outlined circles represent samples that

277 were used to train the 46- and 37-site models, while solid circles represent test set samples.

278

279 Table 2 - Root mean squared errors (RMSE) for each prediction model tested; the Horvath  
280 model, the 46-site model and the 37-site model. As the Horvath model was not trained on any  
281 of the individuals analyzed here, the RMSE for all samples is also reported. Of these three, the  
282 37-site bone clock performs best in the test set of individuals.

283

| <b>Model</b>         | <b>Root mean squared error (years)</b> |                     |                                |                                        |                                |                                |
|----------------------|----------------------------------------|---------------------|--------------------------------|----------------------------------------|--------------------------------|--------------------------------|
|                      | <i>All samples</i>                     | <i>Test samples</i> |                                |                                        |                                |                                |
|                      |                                        | All test samples    | Preserved samples (this study) | Osteoporosis study (Reppe et al. 2017) | GSE64490 (Horvath et al. 2015) | GSE64491 (Horvath et al. 2015) |
| <i>Horvath model</i> | 7.4                                    | 7.7                 | 11.7                           | 8.1                                    | 3.9                            | 5.5                            |
| <i>46 site model</i> | -                                      | 5.1                 | 8.4                            | 4.2                                    | 4.6                            | 5.4                            |
| <i>37 site model</i> | -                                      | 4.9                 | 7.1                            | 4.2                                    | 4.8                            | 4.3                            |

284

285



286 Table 3 – Details of the 37 bone clock CpG sites. The names of all CpG sites that comprise our  
 287 best model are reported here, along with their genomic positions (based on the hg19/GRCh37  
 288 reference), the gene(s) they are annotated to (if any), and their relative positions within those  
 289 genes. The positions of these CpG sites are either within the transcriptional start site (TSS),  
 290 gene body, exons, or untranslated regions (UTR). The two bone clock CpG sites that are also  
 291 used by the Horvath clock are indicated by an asterisk.  
 292

| Name        | Position    | UCSC Gene Name          | UCSC Gene Group             |
|-------------|-------------|-------------------------|-----------------------------|
| cg01974375  | 1:151298954 | PI4KB                   | TSS1500                     |
| cg21748207  | 2:26395359  | FAM59B                  | TSS1500                     |
| cg12206199  | 2:39187543  | LOC375196, LOC100271715 | TSS200, Body                |
| cg20547295  | 2:69664869  | NFU1                    | TSS200                      |
| cg27213509  | 2:176947228 | EVX2                    | Body                        |
| cg21545859  | 3:5068037   |                         |                             |
| cg03607117  | 3:53080440  | SFMBT1                  | TSS1500                     |
| cg07553761  | 3:160167977 | TRIM59                  | TSS1500                     |
| cg23995914  | 4:10459228  | ZNF518B                 | TSS200                      |
| cg07171111  | 4:10462903  |                         |                             |
| cg01899437  | 4:24914441  | CCDC149                 | 1 <sup>st</sup> exon, 5'UTR |
| cg03133735  | 4:111562270 |                         |                             |
| cg03663715  | 5:72744904  | FOXD1                   | TSS1500                     |
| cg23500537  | 5:140419819 |                         |                             |
| cg13773570  | 6:6006707   | NRN1                    | Body                        |
| cg16867657  | 6:11044877  | ELOVL2                  | TSS1500                     |
| cg24724428  | 6:11044888  | ELOVL2                  | TSS1500                     |
| cg00464814  | 6:16758889  | ATXN1                   | 5'UTR                       |
| cg22736354* | 6:18122719  | NHLRC1                  | 1 <sup>st</sup> exon        |
| cg10970124  | 6:31634602  | BAT4, CSNK2B            | TSS1500, 5'UTR              |
| cg13959344  | 6:32901642  |                         |                             |
| cg08541518  | 6:69942892  | BAI3                    | Body                        |
| cg19509311  | 6:106429191 |                         |                             |
| cg00590036  | 6:158957433 | TMEM181                 | TSS200                      |
| cg07955995  | 7:130419159 | KLF14                   | TSS1500                     |
| cg24681895  | 8:145743681 | RECQL4, LRRC14          | TSS1500, 5'UTR              |
| cg10217503  | 12:65153209 | GNS                     | 5'UTR, 1 <sup>st</sup> exon |
| cg22171539  | 12:81107990 |                         |                             |
| cg11082362  | 14:36003181 | INSM2                   | TSS200                      |

|             |             |                |                      |
|-------------|-------------|----------------|----------------------|
| cg21801378* | 15:72612125 | BRUNOL6        | 1 <sup>st</sup> exon |
| cg06279276  | 16:67184164 | B3GNT9         | Body                 |
| cg24668364  | 17:16284324 | UBB            | TSS200               |
| cg22361181  | 17:40171740 | NKIRAS2        | TSS1500, 5'UTR       |
| cg16969368  | 17:57642752 | DHX40          | TSS200               |
| cg17243289  | 18:45458021 | SMAD2          | TSS1500              |
| cg16665444  | 18:76828655 | ATP9B          | TSS1500              |
| cg02997982  | 19:41082291 | SHKBP1, SPTBN4 | TSS1500, 3'UTR       |

## 294 Discussion

295 In this study, we present newly generated genome-wide DNA methylation data from  
296 adult human bones spanning a nearly 4 decade age range. We incorporate additional DNA  
297 methylation array data derived from living and deceased donors, resulting in a combined  
298 dataset that spans a total age range of over 6 decades, which we use to conduct the first  
299 comprehensive analysis of patterns of epigenetic aging in adult human bone tissue. We show  
300 that a previously published epigenetic age predictor generates reasonably accurate estimates  
301 of chronological age based on DNA methylation data from 353 CpG sites (RMSE 7.4) (Horvath  
302 2013).

303 Surprisingly, we achieved more accurate estimates of chronological age using the  
304 Horvath algorithm on the GSE64490 and GSE64491 datasets than the original publication  
305 (RMSE of 6.0 years rather than ~8.1 years) (Horvath et al., 2015). This may be due to differences  
306 in processing the raw DNA methylation signal data. One major difference is our implementation  
307 of the beta mixture quantile dilation (BMIQ) normalization method, which corrects for technical  
308 differences between probes measured with the Type I and Type II Illumina chemistry, on all  
309 probes in the dataset (Teschendorff et al., 2013). By contrast, Horvath et al. uses a custom  
310 script to normalize data, which is based on the BMIQ method but uses a ‘gold standard’  
311 reference panel of Type II probes (Horvath, 2013; Horvath et al., 2015). There may be additional  
312 differences in our processing pipelines beyond this normalization step, but it is nonetheless  
313 noteworthy that such significant variation in overall accuracy can result from such differences.

314 Relative to the best implementation of the Horvath model, I demonstrate that even  
315 more accurate estimates of chronological age can be generated for human bone from nearly 10  
316 times fewer sites. There are two likely reasons for this improvement. The first is that the  
317 original Horvath model was only trained on CpG sites that were present on an earlier Illumina  
318 DNA methylation array, which assayed 27 thousand sites (Horvath 2013). This excluded any  
319 sites present on the more comprehensive 450k array, many of which were reported to be  
320 excellent potential predictors of age. For example, it was demonstrated that DNA methylation  
321 at the gene ELOVL2, and in particular the CpG site cg16867657, showed a strong and precise  
322 relationship with age (Garagnani et al., 2012). This association was confirmed in subsequent

323 studies, which further supported its utility for estimating chronological age in humans with  
324 potential forensic applications (Hannum et al., 2013; Johansson et al., 2013; Naue et al., 2017;  
325 Spólnicka et al., 2018; Zbieć-Piekarska et al., 2015a). By training our predictor on data from age-  
326 associated CpG sites identified from 450k array data, we were able to achieve accurate results  
327 using fewer and, arguably, better markers of chronological age.

328         The second reason for improved accuracy is our focus on a single tissue rather than the  
329 Horvath model's focus on multiple tissues. It is well known that genomic patterns of DNA  
330 methylation differ broadly across tissue types; in fact, DNA methylation is an important  
331 mechanism by which tissue identity is established during development (Lokk et al., 2014;  
332 Rakyan et al., 2008). That these tissue-specific differences intersect with changes in DNA  
333 methylation with age is also well established (Dmitrijeva et al., 2018; Hannum et al., 2013;  
334 Maegawa et al., 2010; Slieker et al., 2018). It is therefore unsurprising that it would be  
335 challenging to develop a predictor of age that is equally accurate on all human tissue types. In  
336 fact, the Horvath model has been used to argue that different tissues 'age' at different rates  
337 based on the consistent deviations from a linear model relating chronological age to the  
338 predicted age (Horvath et al., 2015, 2014).

339         It is important to note here a difference in the motivations behind the Horvath model  
340 and any model intended for forensic applications, including the one presented here. The  
341 Horvath model is primarily used as a measure of a conceptual 'biological', not chronological,  
342 age, which reflects individual functional capacity and overall health rather than simply the  
343 number of years lived. The 37 bone clock CpGs identified here may therefore be best suited for  
344 forensic applications, and not for estimating health status.

345         It is interesting to note that one of the significant results of the enrichment analysis was  
346 the gene ELOVL2. Two of 37 CpG sites selected by lasso regression, the aforementioned  
347 cg16867657 as well as cg23606718, were annotated to this gene. This supports the idea that  
348 the gene ELOVL2 is a uniquely useful predictor of chronological age, as it is significantly  
349 associated with age across multiple tissue types, including blood, saliva, brain, buccal cells, liver,  
350 fat, breast, kidney, lung, teeth, and now, bone, as well as across diverse populations (Bekaert et  
351 al., 2015; Giuliani et al., 2016; Gopalan et al., 2017; Hannum et al., 2013; Johansson et al., 2013;

352 Slieker et al., 2018). However, it is still unclear if the specific relationship between DNA  
353 methylation level and age (i.e., the ‘slope’ and intercept’ of the linear model) is consistent  
354 across all these tissue types.

355 The second significant enrichment category identified here was the presence of the  
356 AAGCACA motif in the 3’ UTR. Genes that bear this motif are putative targets of negative  
357 regulation by the miR-218 microRNA, which carries the complementary sequence (Subramanian  
358 et al., 2005). It has been shown that miR-218 is upregulated during osteoblast differentiation,  
359 driving bone differentiation via a positive feedback loop involving the Wnt pathway (Hassan et  
360 al., 2012). Interestingly, while miR-218 has been shown to have tumor-suppressing activity in  
361 multiple tissue types, it also promotes metastasis of breast cancer to bone by mimicking this  
362 molecular signature of bone differentiation (Alajez et al., 2011; Hassan et al., 2012; Liu et al.,  
363 2018; Tatarano et al., 2011; Venkataraman et al., 2013; Yang et al., 2017). While it is unclear if  
364 the enrichment of miR-218 targets among the bone clock CpGs is meaningful, it is nevertheless  
365 tempting to speculate that it suggests a bone-specific characteristic of our predictive model.

366 A significant limitation of this study is the age range of individuals available for training  
367 the model. While the datasets altogether provided a cross-section of 63 years of adult human  
368 lifespan, it is not clear if our bone clock can accurately estimate the age of younger adults. In an  
369 attempt to improve age-association detection power by increasing the sample size and the age  
370 range surveyed, we also assayed 13 forensic samples on the EPIC methylation array (see  
371 *Methods*). Unfortunately, none of these passed post-assay quality control metrics and therefore  
372 could not be reliably analyzed alongside the other samples. It is likely that the DNA in these  
373 samples was already too degraded for quantitative measures of DNA methylation to be  
374 recovered after a few years of exposure to the elements and taphonomic processes. A common  
375 type of DNA damage occurs when cytosines are spontaneously degraded into thymines if they  
376 are methylated or uracils if they are unmethylated. Bisulphite treatment, which precedes most  
377 DNA methylation assay techniques, also converts unmethylated cytosines to uracils that are  
378 later read as thymines, but does not affect methylated cytosines; the attached methyl group  
379 ‘protects’ those cytosines from being mutated. DNA methylation levels are subsequently  
380 measured from the difference between the cytosines and thymines at a given CpG site.

381 Therefore, post-mortem cytosine damage will generally make methylated cytosines appear  
382 unmethylated, a phenomenon that is the likely explanation for the large difference observed  
383 between the median methylated and unmethylated signals in the forensic samples (Figure 1).

384 The poor quality of our forensic DNA samples does not negate the utility of bone-  
385 specific DNA methylation-based age predictor. It does, however, highlight several practical  
386 considerations related to the application of any method that relies on good-quality DNA,  
387 including preservation and skeletal element choice. These issues have started to be  
388 investigated in the context of ancient DNA, where there is significant interest in understanding  
389 the DNA methylation profiles of individuals at different points in the past (Gokhman et al.,  
390 2017, 2014; Llamas et al., 2012; Pedersen et al., 2014; Seguin-Orlando et al., 2015; Smith et al.,  
391 2015). Studies have shown that it is possible to recover accurate measurements of DNA  
392 methylation at individual CpG site level even for samples that are thousands of years old  
393 (Llamas et al., 2012; Smith et al., 2015). However, the success of such bisulfite-based DNA  
394 methylation assays depends on the quality and preservation of the input DNA (Seguin-Orlando  
395 et al., 2015). Therefore, bone clock developed here may have substantial utility for forensic  
396 investigations when used in the appropriate contexts.

397 The forensic samples in the present study may have been from individuals that were  
398 particularly poorly preserved, but additionally, the skeletal element sampled, the intercondylar  
399 fossa of the femur, is not ideal for the recovery of DNA. Ancient DNA studies have shown that  
400 the petrous portion of the temporal bone is a good source of DNA that is relatively resistant to  
401 contamination and degradation (Gamba et al., 2014; Pinhasi et al., 2015). It is, however,  
402 difficult to access without significant destruction of the skull, which was permitted for the  
403 preserved samples but not for those sourced from the forensic collection. In ancient DNA  
404 studies, a sample's collagen content is usually measured first before deciding if sequencing  
405 should be done, as this is a good indicator of preservation and DNA quality (Ovchinnikov et al.,  
406 2000). This may also be a worthwhile step to incorporate into a forensic investigation workflow  
407 when deciding which aging method is most appropriate for a given case.

408 In this study, we show that chronological age can be accurately estimated from bone-  
409 derived DNA from human adults. This model represents a promising molecular method that

410 may be useful for building biological profiles of unknown individuals in forensic cases. Future  
411 research to focus on further refining the bone clock CpG set may allow for the development of  
412 more precise and, importantly, more cost-effective methods of aging individuals' skeletal  
413 remains using DNA methylation markers.  
414

415 **Acknowledgements**

416 We would like to thank Daniel Wescott, Randall Susman, and Danny Soto for generously  
417 granting access to their respective collections of human remains. We would also like to thank  
418 Sjur Reppe for providing access to his bone DNA methylation dataset. Research funding and  
419 support for SG was provided by a National Institute of Justice Graduate Research Fellowship  
420 (2016-DN-BX-0011). JG was supported by a grant from the Undergraduate Research and  
421 Creative Activities summer program (URECA, Stony Brook University).



422 **References**

- 423 Alajez, N.M., Lenarduzzi, M., Ito, E., Hui, A.B.Y., Shi, W., Bruce, J., Yue, S., Huang, S.H., Xu, W.,  
424 Waldron, J., O’Sullivan, B., Liu, F.F., 2011. miR-218 suppresses nasopharyngeal cancer  
425 progression through downregulation of survivin and the SLIT2-ROBO1 pathway. *Cancer*  
426 *Res.* 71, 2381–2391.
- 427 Aryee, M.J., Jaffe, A.E., Corrada-Bravo, H., Ladd-Acosta, C., Feinberg, A.P., Hansen, K.D., Irizarry,  
428 R.A., 2014. Minfi: a flexible and comprehensive Bioconductor package for the analysis of  
429 Infinium DNA methylation microarrays. *Bioinformatics* 30, 1363–1369.
- 430 Bekaert, B., Kamalandua, A., Zapico, S.C., Voorde, W. Van De, Decorte, R., 2015. Improved age  
431 determination of blood and teeth samples using a selected set of DNA methylation  
432 markers. *Epigenetics* 10, 922–930.
- 433 Chen, Y.A., Lemire, M., Choufani, S., Butcher, D.T., Grafodatskaya, D., Zanke, B.W., Gallinger, S.,  
434 Hudson, T.J., Weksberg, R., 2013. Discovery of cross-reactive probes and polymorphic  
435 CpGs in the Illumina Infinium HumanMethylation450 microarray. *Epigenetics* 8, 203–209.
- 436 Cunha, E., Baccino, E., Martrille, L., Ramsthaler, F., Prieto, J., Schuliar, Y., Lynnerup, N.,  
437 Cattaneo, C., 2009. The problem of aging human remains and living individuals: a review.  
438 *Forensic Sci. Int.* 193, 1–13.
- 439 Davis, S., Du, P., Bilke, S., Triche, T., Bootwalla, M., 2015. methylumi: Handle Illumina  
440 methylation data.
- 441 Dmitrijeva, M., Ossowski, S., Serrano, L., Schaefer, M.H., 2018. Tissue-specific DNA methylation  
442 loss during ageing and carcinogenesis is linked to chromosome structure, replication  
443 timing and cell division rates. *Nucleic Acids Res.* 46, 7022–7039.
- 444 Du, P., Kibbe, W.A., Lin, S.M., 2008. lumi: a pipeline for processing Illumina microarray.  
445 *Bioinformatics* 24, 1547–1548.
- 446 Franklin, D., 2010. Forensic age estimation in human skeletal remains: current concepts and  
447 future directions. *Leg. Med.* 12, 1–7.
- 448 Friedman, J., Hastie, T., Tibshirani, R., 2010. Regularization paths for generalized linear models  
449 via coordinate descent. *J. Stat. Softw.* 33, 1–22.

- 450 Gamba, C., Jones, E.R., Teasdale, M.D., McLaughlin, R.L., Gonzalez-Fortes, G., Mattiangeli, V.,  
451 Domboróczki, L., Kővári, I., Pap, I., Anders, A., Whittle, A., Dani, J., Raczky, P., Higham,  
452 T.F.G., Hofreiter, M., Bradley, D.G., Pinhasi, R., 2014. Genome flux and stasis in a five  
453 millennium transect of European prehistory. *Nat. Commun.* 5, 5257.
- 454 Garagnani, P., Bacalini, M.G., Pirazzini, C., Gori, D., Giuliani, C., Mari, D., Di Blasio, A.M.,  
455 Gentilini, D., Vitale, G., Collino, S., Rezzi, S., Castellani, G., Capri, M., Salvioli, S., Franceschi,  
456 C., 2012. Methylation of ELOVL2 gene as a new epigenetic marker of age. *Aging Cell* 11,  
457 1132–1134.
- 458 Gibbon, V.E., Penny, C.B., Štrkalj, G., Ruff, P., 2009. Brief communication: minimally invasive  
459 bone sampling method for DNA analysis. *Am. J. Phys. Anthropol.* 139, 596–599.
- 460 Giuliani, C., Cilli, E., Bacalini, M.G., Pirazzini, C., Sazzini, M., Gruppioni, G., Franceschi, C.,  
461 Garagnani, P., Luiselli, D., 2016. Inferring chronological age from DNA methylation  
462 patterns of human teeth. *Am. J. Phys. Anthropol.* 159, 585–595.
- 463 Gokhman, D., Lavi, E., Prüfer, K., Fraga, M.F., Riancho, J.A., Kelso, J., Pääbo, S., Meshorer, E.,  
464 Carmel, L., 2014. Reconstructing the DNA methylation maps of the Neandertal and the  
465 Denisovan. *Science.* 344, 523–527.
- 466 Gokhman, D., Malul, A., Carmel, L., 2017. Inferring past environments from ancient  
467 epigenomes. *Mol. Biol. Evol.* 34, 2429–2438.
- 468 Gopalan, S., Carja, O., Fagny, M., Patin, E., Myrick, J.W., McEwen, L.M., Mah, S.M., Kobor, M.S.,  
469 Froment, A., Feldman, M.W., Quintana-Murci, L., Henn, B.M., 2017. Trends in DNA  
470 methylation with age replicate across diverse human populations. *Genetics* 206, 1659–  
471 1674.
- 472 Hannum, G., Guinney, J., Zhao, L., Zhang, L., Hughes, G., Sada, S., Klotzle, B., Bibikova, M., Fan,  
473 J.-B., Gao, Y., Deconde, R., Chen, M., Rajapakse, I., Friend, S., Ideker, T., Zhang, K., 2013.  
474 Genome-wide methylation profiles reveal quantitative views of human aging rates. *Mol.*  
475 *Cell* 49, 359–367.
- 476 Hassan, M.Q., Maeda, Y., Taipaleenmaki, H., Zhang, W., Jafferji, M., Gordon, J.A.R., Li, Z., Croce,  
477 C.M., van Wijnen, A.J., Stein, J.L., Stein, G.S., Lian, J.B., 2012. miR-218 directs a Wnt

478 signaling circuit to promote differentiation of osteoblasts and osteomimicry of metastatic  
479 cancer cells. *J. Biol. Chem.* 287, 42084–42092.

480 Hong, S.R., Jung, S.-E., Lee, E.H., Shin, K.-J., Yang, W.I., Lee, H.Y., 2017. DNA methylation-based  
481 age prediction from saliva: high age predictability by combination of 7 CpG markers.  
482 *Forensic Sci. Int. Genet.* 29, 118–125.

483 Horvath, S., 2013. DNA methylation age of human tissues and cell types. *Genome Biol.* 14,  
484 R115.

485 Horvath, S., Erhart, W., Brosch, M., Ammerpohl, O., Schönfels, W. von, Ahrens, M., Heits, N.,  
486 Bell, J.T., Tsai, P.-C., Spector, T.D., Deloukas, P., Siebert, R., Sipos, B., Becker, T., Röcken, C.,  
487 Schafmayer, C., Hampe, J., 2014. Obesity accelerates epigenetic aging of human liver.  
488 *Proc. Natl. Acad. Sci.* 201412759.

489 Horvath, S., Mah, V., Lu, A.T., Woo, J.S., Choi, O.-W., Jasinska, A.J., Riancho, J.A., Tung, S., Coles,  
490 N.S., Braun, J., Vinters, H. V, Coles, L.S., 2015. The cerebellum ages slowly according to the  
491 epigenetic clock. *Aging* 7, 294–305.

492 Johansson, A., Enroth, S., Gyllensten, U., 2013. Continuous aging of the human DNA methylome  
493 throughout the human lifespan. *PLoS One* 8, e67378.

494 Lee, H.Y., Jung, S.E., Oh, Y.N., Choi, A., Yang, W.I., Shin, K.J., 2015. Epigenetic age signatures in  
495 the forensically relevant body fluid of semen: a preliminary study. *Forensic Sci. Int. Genet.*  
496 19, 28–34.

497 Liu, X., Cao, M., Palomares, M., Wu, X., Li, A., Yan, W., Fong, M.Y., Chan, W.-C., Wang, S.E.,  
498 2018. Metastatic breast cancer cells overexpress and secrete miR-218 to regulate type I  
499 collagen deposition by osteoblasts. *Breast Cancer Res.* 20, 127.

500 Llamas, B., Holland, M.L., Chen, K., Cropley, J.E., Cooper, A., Suter, C.M., 2012. High-resolution  
501 analysis of cytosine methylation in ancient DNA. *PLoS One* 7, e30226.

502 Løkk, L., Modhukur, V., Rajashekar, B., Märtens, K., Mägi, R., Kolde, R., Koltšina, M., Nilsson, T.,  
503 Vilo, J., Salumets, A., Tõnisson, N., 2014. DNA methylome profiling of human tissues  
504 identifies global and tissue-specific methylation patterns. *Genome Biol.* 15, r54.

- 505 Maegawa, S., Hinkal, G., Kim, H.S., Shen, L., Zhang, L., Zhang, J., Zhang, N., Liang, S., Donehower,  
506 L.A., Issa, J.-P.J., 2010. Widespread and tissue specific age-related DNA methylation  
507 changes in mice. *Genome Res.* 20, 332–340.
- 508 McLean, C.Y., Bristor, D., Hiller, M., Clarke, S.L., Schaar, B.T., Lowe, C.B., Wenger, A.M.,  
509 Bejerano, G., 2010. GREAT improves functional interpretation of cis-regulatory regions.  
510 *Nat. Biotechnol.* 28, 495–501.
- 511 Meissner, C., Ritz-Timme, S., 2010. Molecular pathology and age estimation. *Forensic Sci. Int.*  
512 203, 34–43.
- 513 Naue, J., Hoefsloot, H.C.J., Mook, O.R.F., Rijlaarsdam-Hoekstra, L., van der Zwalm, M.C.H.,  
514 Henneman, P., Kloosterman, A.D., Verschure, P.J., 2017. Chronological age prediction  
515 based on DNA methylation: massive parallel sequencing and random forest regression.  
516 *Forensic Sci. Int. Genet.* 31, 19–28.
- 517 Ohtani, S., Yamamoto, T., 2010. Age estimation by amino acid racemization in human teeth. *J.*  
518 *Forensic Sci.* 55, 1630–1633.
- 519 Ovchinnikov, I. V., Götherström, A., Romanova, G.P., Kharitonov, V.M., Lidén, K., Goodwin, W.,  
520 2000. Molecular analysis of Neanderthal DNA from the northern Caucasus. *Nature* 404,  
521 490–493.
- 522 Pedersen, J.S., Valen, E., Velazquez, A.M.V., Parker, B.J., Rasmussen, M., Lindgreen, S., Lilje, B.,  
523 Tobin, D.J., Kelly, T.K., Vang, S., Andersson, R., Jones, P.A., Hoover, C.A., Tikhonov, A.,  
524 Prokhortchouk, E., Rubin, E.M., Sandelin, A., Gilbert, M.T.P., Krogh, A., Willerslev, E.,  
525 Orlando, L., 2014. Genome-wide nucleosome map and cytosine methylation levels of an  
526 ancient human genome. *Genome Res.* 24, 454–466.
- 527 Pidsley, R., Wong, C.C.Y., Volta, M., Lunnon, K., Mill, J., Schalkwyk, L.C., 2013. A data-driven  
528 approach to preprocessing Illumina 450K methylation array data. *BMC Genomics* 14, 293.
- 529 Pidsley, R., Zotenko, E., Peters, T.J., Lawrence, M.G., Risbridger, G.P., Molloy, P., Van Dijk, S.,  
530 Muhlhausler, B., Stirzaker, C., Clark, S.J., 2016. Critical evaluation of the Illumina  
531 MethylationEPIC BeadChip microarray for whole-genome DNA methylation profiling.  
532 *Genome Biol.* 17, 208.

- 533 Pinhasi, R., Fernandes, D., Sirak, K., Novak, M., Connell, S., Alpaslan-Roodenberg, S., Gerritsen,  
534 F., Moiseyev, V., Gromov, A., Raczky, P., Anders, A., Pietrusewsky, M., Rollefson, G.,  
535 Jovanovic, M., Trinhhoang, H., Bar-Oz, G., Oxenham, M., Matsumura, H., Hofreiter, M.,  
536 2015. Optimal ancient DNA yields from the inner ear part of the human petrous bone.  
537 PLoS One 10, e0129102.
- 538 Rakyan, V.K., Down, T.A., Thorne, N.P., Flicek, P., Kulesha, E., Gräf, S., Tomazou, E.M., Bäckdahl,  
539 L., Johnson, N., Herberth, M., Howe, K.L., Jackson, D.K., Miretti, M.M., Fiegler, H., Marioni,  
540 J.C., Birney, E., Hubbard, T.J.P., Carter, N.P., Tavaré, S., Beck, S., 2008. An integrated  
541 resource for genome-wide identification and analysis of human tissue-specific  
542 differentially methylated regions (tDMRs). *Genome Res.* 18, 1518–1529.
- 543 Reppe, S., Lien, T.G., Hsu, Y.-H., Gautvik, V.T., Olstad, O.K., Yu, R., Bakke, H.G., Lyle, R., Kringen,  
544 M.K., Glad, I.K., Gautvik, K.M., 2017. Distinct DNA methylation profiles in bone and blood  
545 of osteoporotic and healthy postmenopausal women. *Epigenetics* 12, 674–687.
- 546 Rohatgi, A., 2018. WebPlotDigitizer.
- 547 Seguin-Orlando, A., Gamba, C., Der Sarkissian, C., Ermini, L., Louvel, G., Boulygina, E., Sokolov,  
548 A., Nedoluzhko, A., Lorenzen, E.D., Lopez, P., McDonald, H.G., Scott, E., Tikhonov, A.,  
549 Stafford, T.W., Alfarhan, A.H., Alquraishi, S.A., Al-Rasheid, K.A.S., Shapiro, B., Willerslev, E.,  
550 Prokhortchouk, E., Orlando, L., 2015. Pros and cons of methylation-based enrichment  
551 methods for ancient DNA. *Sci. Rep.* 5, 11826.
- 552 Slieker, R.C., Relton, C.L., Gaunt, T.R., Slagboom, P.E., Heijmans, B.T., 2018. Age-related DNA  
553 methylation changes are tissue-specific with ELOVL2 promoter methylation as exception.  
554 *Epigenetics and Chromatin* 11, 25.
- 555 Smith, R.W.A., Monroe, C., Bolnick, D.A., 2015. Detection of cytosine methylation in ancient  
556 DNA from five Native American populations using bisulfite sequencing. *PLoS One* 10,  
557 e0125344.
- 558 Spólnicka, M., Pośpiech, E., Pepłońska, B., Zbieć-Piekarska, R., Makowska, Ż., Pięta, A.,  
559 Karłowska-Pik, J., Ziemkiewicz, B., Wężyk, M., Gasperowicz, P., Bednarczuk, T.,  
560 Barcikowska, M., Żekanowski, C., Płoski, R., Branicki, W., 2018. DNA methylation in

561 ELOVL2 and C1orf132 correctly predicted chronological age of individuals from three  
562 disease groups. *Int. J. Legal Med.* 132, 1–11.

563 Subramanian, A., Tamayo, P., Mootha, V.K., Mukherjee, S., Ebert, B.L., Gillette, M.A., Paulovich,  
564 A., Pomeroy, S.L., Golub, T.R., Lander, E.S., Mesirov, J.P., 2005. Gene set enrichment  
565 analysis: a knowledge-based approach for interpreting genome-wide expression profiles.  
566 *Proc. Natl. Acad. Sci.* 102, 15545–15550.

567 Tatarano, S., Chiyomaru, T., Kawakami, K., Enokida, H., Yoshino, H., Hidaka, H., Yamasaki, T.,  
568 Kawahara, K., Nishiyama, K., Seki, N., Nakagawa, M., 2011. miR-218 on the genomic loss  
569 region of chromosome 4p15.31 functions as a tumor suppressor in bladder cancer. *Int. J.*  
570 *Oncol.* 39, 13–21.

571 Teschendorff, A.E., Marabita, F., Lechner, M., Bartlett, T., Tegner, J., Gomez-Cabrero, D., Beck,  
572 S., 2013. A beta-mixture quantile normalization method for correcting probe design bias  
573 in Illumina Infinium 450 k DNA methylation data. *Bioinformatics* 29, 189–196.

574 Venkataraman, S., Birks, D.K., Balakrishnan, I., Alimova, I., Harris, P.S., Patel, P.R., Handler, M.H.,  
575 Dubuc, A., Taylor, M.D., Foreman, N.K., Vibhakar, R., 2013. MicroRNA 218 acts as a tumor  
576 suppressor by targeting multiple cancer phenotype-associated genes in medulloblastoma.  
577 *J. Biol. Chem.* 288, 1918–1928.

578 Vidaki, A., Ballard, D., Aliferi, A., Miller, T.H., Barron, L.P., Syndercombe Court, D., 2017. DNA  
579 methylation-based forensic age prediction using artificial neural networks and next  
580 generation sequencing. *Forensic Sci. Int. Genet.* 28, 225–236.

581 Yang, Y., Ding, L., Hu, Q., Xia, J., Sun, J., Wang, X., Xiong, H., Gurbani, D., Li, L., Liu, Y., Liu, A.,  
582 2017. MicroRNA-218 functions as a tumor suppressor in lung cancer by targeting IL-  
583 6/STAT3 and negatively correlates with poor prognosis. *Mol. Cancer* 16, 141.

584 Yi, S.H., Xu, L.C., Mei, K., Yang, R.Z., Huang, D.X., 2014. Isolation and identification of age-related  
585 DNA methylation markers for forensic age-prediction. *Forensic Sci. Int. Genet.* 11, 117–  
586 125.

587 Zbieć-Piekarska, R., Spólnicka, M., Kupiec, T., Makowska, Ż., Spas, A., Parys-Proszek, A.,  
588 Kucharczyk, K., Płoski, R., Branicki, W., 2015a. Examination of DNA methylation status of

589 the ELOVL2 marker may be useful for human age prediction in forensic science. Forensic  
590 Sci. Int. Genet. 14, 161–167.

591 Zbieć-Piekarska, R., Spólnicka, M., Kupiec, T., Parys-Proszek, A., Makowska, Ż., Pałeczka, A.,  
592 Kucharczyk, K., Płoski, R., Branicki, W., 2015b. Development of a forensically useful age  
593 prediction method based on DNA methylation analysis. Forensic Sci. Int. Genet. 17, 173–  
594 179.
